# Supplementary material for: Enhancing CRISPR prime editing by reducing misfolded pegRNA interactions
Source: PubMed Central journal article supplement (PMC11161173; doi:10.7554/elife.90948), 2024-06-07

a

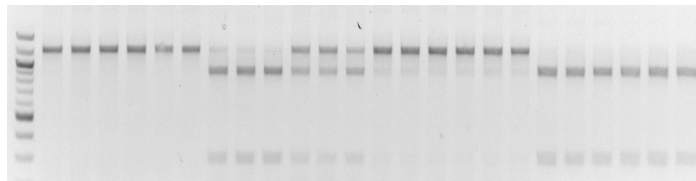

b

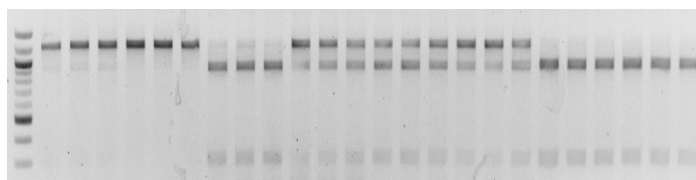

c

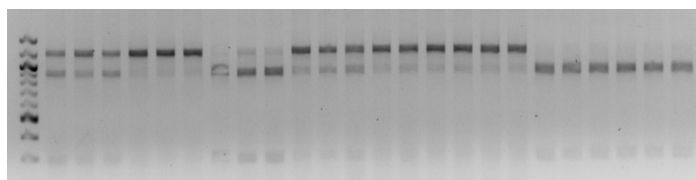

d

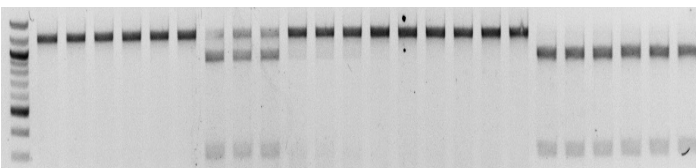

Supplement: elife-90948-fig1-data1.pdf [file elife-90948-fig1-data1.pdf]
