# Supplementary material for: Enhancing CRISPR prime editing by reducing misfolded pegRNA interactions
Source: eLife journal article supplement (doi:10.7554/elife.90948), 2023-09-27

**a** *adgrf3b*

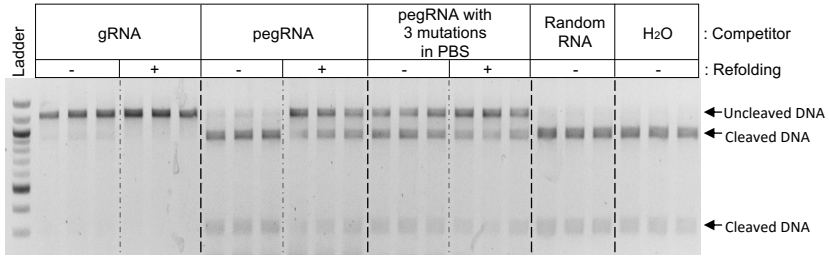

**b** *cacng2b*

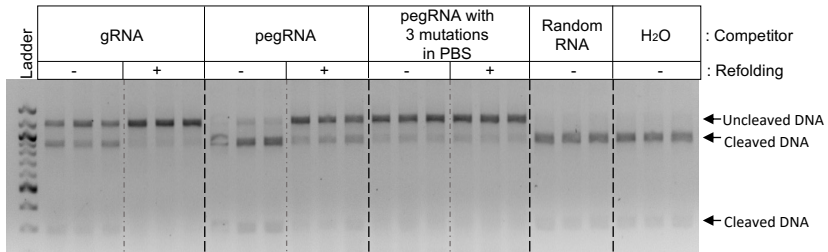

**c** *gpr85*

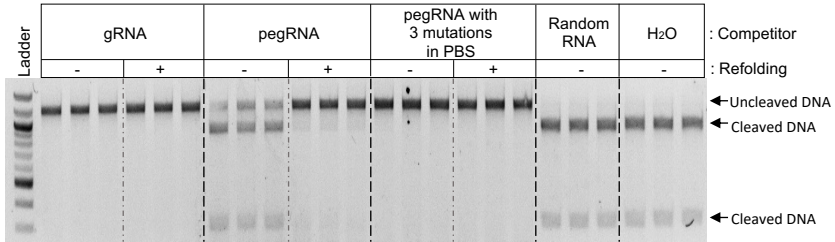

Supplement: fig1-data2 [file elife-90948-fig1-data2-v1.pdf]
