# Supplementary material for: Enhancing CRISPR prime editing by reducing misfolded pegRNA interactions
Source: eLife journal article supplement (doi:10.7554/elife.90948), 2023-09-27
Supplement: fig1-data3 [file elife-90948-fig1-data3-v1.pdf]

| pegRNA                             | pegRNA 5' spacer sequence<br>(5' → 3') | pegRNA 3' extension sequence<br>for RTT and PBS (5' → 3') | Specified edit | PBS length<br>(nucleotides) | RTT length<br>(nucleotides) |
|------------------------------------|----------------------------------------|-----------------------------------------------------------|----------------|-----------------------------|-----------------------------|
| gpr78a-P10R14-S5-C9E               | GAAACACTACGGCTATCCAG                   | <b>GGCATAGACAGCTG</b> <u>GATAGCCGTA</u>                   | +5 G → T       | 10                          | 14                          |
| gpr78a-P10R14-S5-C9E-3MUTS in PBS  | GAAACACTACGGCTATCCAG                   | <b>GGCATAGACAGCTG</b> <u>CAT</u> <b>TGC</b> <u>GGTA</u>   | +5 G → T       | 10                          | 14                          |
| adgrf3b-P10R15-S5-C9E              | GGTGTATGGCAGATGTCCAG                   | <b>GCTTCGTCGCGTCTG</b> <u>GACATCTGCC</u>                  | +5 G → C       | 10                          | 15                          |
| adgrf3b-P10R15-S5-C9E-3MUTS in PBS | GGTGTATGGCAGATGTCCAG                   | <b>GCTTCGTCGCGTCTG</b> <u>CACTTC</u> <b>AGCC</b>          | +5 G → C       | 10                          | 15                          |
| cacng2b-P10R15-S5-C9E              | GGTGGAATGCGGCAGTATGG                   | <b>GCTCAAACACGCCCA</b> <u>TACTGCCGCA</u>                  | +5 G → C       | 10                          | 15                          |
| cacng2b-P10R15-S5-C9E-3MUTS in PBS | GGTGGAATGCGGCAGTATGG                   | <b>GCTCAAACACGCCCA</b> <u>AC</u> <b>AGC</b> <u>GGCA</u>   | +5 G → C       | 10                          | 15                          |
| gpr85-P10R14-S5-C9E                | GGAGGTCAGTTTAAGGAAAG                   | <b>TCCGCTCGCGACTT</b> <u>TCCTTAAACT</u>                   | +5 G → C       | 10                          | 14                          |
| gpr85-P10R14-S5-C9E-3MUTS in PBS   | GGAGGTCAGTTTAAGGAAAG                   | <b>TCCGCTCGCGACTT</b> <u>ACCATA</u> <b>TACT</b>           | +5 G → C       | 10                          | 14                          |
