# Supplementary material for: Enhancing CRISPR prime editing by reducing misfolded pegRNA interactions
Source: eLife. 2024 Jun 7;12:RP90948. doi: 10.7554/eLife.90948 (PMC11161173; doi:10.7554/eLife.90948)
Supplement: Supplementary file 1. [file elife-90948-supp1.xlsx]

## Sheet: Sheet1
Supplementary File 1. PE outcomes for pegRNAs with single and double substitutions and with or without refolding.
Target site	PBS length (nucleotides)	RTT length (nucleotides)	Specified edit	Refolding	Mean pure PE frequency (%)	Figure # of results
gprc5ba	10	14	+5 G to T	No	2.58	Fig. 2a
	10	14	+5 G to T	Yes	2.47	Fig. 2c
	10	14	+5 G to T, +2 A to T	Yes	15.57	Fig. 2c
scn2b	10	14	+5 G to C	No	0.2	Fig. 2a
	10	14	+5 G to C	Yes	1.88333	Fig. 2d
	10	14	+5 G to C, +2 C to G	Yes	2.58667	Fig. 2d
gpr78a	10	14	+5 G to T	No	0.46	Fig. 2a
	10	14	+5 G to T	Yes	6.62	Fig. 2d
	10	14	+5 G to T, +2 A to T	Yes	13.36	Fig. 2d
adgrf3b	10	14	+5 G to C	No	1.21	Fig. 2a
	10	14	+5 G to C	Yes	8.71	Fig. 2d
	10	14	+5 G to C, +2 A to T	Yes	17.9133	Fig. 2d
cacng2b	10	14	+5 G to C	No	2.85	Fig. 2a
	10	14	+5 G to C	Yes	12.0033	Fig. 2d
	10	14	+5 G to C, +2 G to C	Yes	18.6767	Fig. 2d
gpr85	10	14	+5 G to C	No	2.82	Fig. 2a
	10	14	+5 G to C	Yes	1.96	Fig. 2d
	10	14	+5 G to C, +2 A to T	Yes	2.59	Fig. 2d
krasG12V	9	16	+6 G to T	Yes	1	Fig. 2c
	9	16	+6 G to T, +2 G to C	Yes	2.85	Fig. 2c
scn2b	10	14	+5 G to C	Yes	0.39	Fig. 2c
	10	14	+5 G to C, +2 C to G	Yes	1.28	Fig. 2c
