# Supplementary material for: Enhancing CRISPR prime editing by reducing misfolded pegRNA interactions
Source: eLife. 2024 Jun 7;12:RP90948. doi: 10.7554/eLife.90948 (PMC11161173; doi:10.7554/eLife.90948)
Supplement: Supplementary file 2. [file elife-90948-supp2.xlsx]

## Sheet: Sheet1
Supplementary File 2. The target site, RT template, PBS and Cas9-binding scaffold sequences of pegRNAs. The PAM motif in each target sequence is shown in bold. The RT template (RTT) sequences are shown in red. The PBS sequences are underlined. nts, nucleotides.
pegRNA	Target sequence 5'->3'	Sequence for RTT and PBS (5'->3')	Specified edit	PBS length (nts)	RTT length (nts)	Post-edit homology arm length (nts)
gpr78a-P10R14-S5-C9E	GAAACACTACGGCTATCCAGCGG	GGCATAGACAGCTGGATAGCCGTA	+5 G->T	10	14	9
gpr78a-P13R14-S5-C9E	GAAACACTACGGCTATCCAGCGG	GGCATAGACAGCTGGATAGCCGTAGTG	+5 G->T	13	14	9
gpr78a-P10R14-S2S5-C9E	GAAACACTACGGCTATCCAGCGG	GGCATAGACAGCAGGATAGCCGTA	+2 A->T;+5 G->T	10	14	9
gprc5ba-P10R14-S5-C9E	GGGGATCATCGCTGCAGAATGG	AGCAGGAGCAATTCTGCAGCGATG	+5 G->T	10	14	9
gprc5ba-P13R14-S5-C9E	GGGGATCATCGCTGCAGAATGG	AGCAGGAGCAATTCTGCAGCGATGATC	+5 G->T	13	14	9
gprc5ba-P10R14-S1S5-C9E	GGGGATCATCGCTGCAGAATGG	AGCAGGAGCAATTGTGCAGCGATG	+1 G->C;+5 G->T	10	14	9
gprc5ba-P10R14-S2S5-C9E	GGGGATCATCGCTGCAGAATGG	AGCAGGAGCAATACTGCAGCGATG	+2 A->T;+5 G->T	10	14	9
gprc5ba-P10R14-S3S5-C9E	GGGGATCATCGCTGCAGAATGG	AGCAGGAGCAAATCTGCAGCGATG	+3 A->T;+5 G->T	10	14	9
scn2b-P10R14-S5-C9E	GGAAAGGTCGTTCTTATCCAGG	ACTGGAAACGTGGATAAGAACGAC	+5 G->C	10	14	9
scn2b-P13R14-S5-C9E	GGAAAGGTCGTTCTTATCCAGG	ACTGGAAACGTGGATAAGAACGACCTT	+5 G->C	13	14	9
scn2b-P10R14-S5-Aend	GGAAAGGTCGTTCTTATCCAGG	ACTGGAAACGTGGATAAGAACGAC	+5 G->C	10	14	9
scn2b-P10R14-S1S5-Aend	GGAAAGGTCGTTCTTATCCAGG	ACTGGAAACGTGGTTAAGAACGAC	+1 T->A;+5 G->C	10	14	9
scn2b-P10R14-S2S5-Aend	GGAAAGGTCGTTCTTATCCAGG	ACTGGAAACGTGCATAAGAACGAC	+2 C->G;+5 G->C	10	14	9
scn2b-P10R14-S3S5-Aend	GGAAAGGTCGTTCTTATCCAGG	ACTGGAAACGTCGATAAGAACGAC	+3 C->G;+5 G->C	10	14	9
scn2b-P10R14-S2S5-Tend	GGAAAGGTCGTTCTTATCCAGG	ACTGGAAACGTGCATAAGAACGAC	+2 C->G;+5 G->C	10	14	9
adgrf3b-P10R15-S5-C9E	GTGTATGGCAGATGTCCAGAGG	GCTTCGTCGCGTCTGGACATCTGCC	+5 G->C	10	15	10
adgrf3b-P13R15-S5-C9E	GTGTATGGCAGATGTCCAGAGG	GCTTCGTCGCGTCTGGACATCTGCCATA	+5 G->C	13	15	10
adgrf3b-pegDEL5-C9E	GTGTATGGCAGATGTCCAGAGG	AATGGCGCTTCGTCGCGACATCTGCCATA	+1 to +5 CAGAG del	13	16	16
adgrf3b-pegINS3-C9E	GTGTATGGCAGATGTCCAGAGG	GCTTCGTCGCCTCTGAAAGACATCTGCCATA	+1 TTT ins	13	18	15
adgrf3b-P10R15-S2S5-C9E	GTGTATGGCAGATGTCCAGAGG	GCTTCGTCGCGTCAGGACATCTGCC	+2 A->T;+5 G->C	10	15	10
gpr85-P10R14-S5-C9E	GGAGGTCAGTTTAAGGAAAGTGG	TCCGCTCGCGACTTTCCTTAAACT	+5 G->C	10	14	9
gpr85-P13R14-S5-C9E	GGAGGTCAGTTTAAGGAAAGTGG	TCCGCTCGCGACTTTCCTTAAACTGAC	+5 G->C	13	14	9
gpr85-P10R14-S2S5-C9E	GGAGGTCAGTTTAAGGAAAGTGG	TCCGCTCGCGACATTCCTTAAACT	+2 A->T;+5 G->C	10	14	9
cacng2b-P10R15-S5-C9E	GGTGGAATGCGGCAGTATGGGGG	GCTCAAACACGCCCATACTGCCGCA	+5 G->C	10	15	10
cacng2b-P13R15-S5-C9E	GGTGGAATGCGGCAGTATGGGGG	GCTCAAACACGCCCATACTGCCGCATTC	+5 G->C	13	15	10
cacng2b-pegDEL5-C9E	GGTGGAATGCGGCAGTATGGGGG	GCGCTCAAACACTACTGCCGCATTC	+1 to +5 TGGGG del	13	12	12
cacng2b-pegINS9-C9E	GGTGGAATGCGGCAGTATGGGGG	GCGCTCAAACACCCCATGATGGTGCATACTGCCGCA	+3 CACCATCAT ins	10	26	15
cacng2b-pegINS18-C9E	GGTGGAATGCGGCAGTATGGGGG	GCGCTCAAACACCCCATGATGGTGATGATGGTGCATACTGCCGCA	+3 CACCATCATCACCATCAT ins	10	35	15
cacng2b-P10R15-S2S5-C9E	GGTGGAATGCGGCAGTATGGGGG	GCTCAAACACGCCGATACTGCCGCA	+2 G->C;+5 G->C	10	15	10
krasG12V-P11R16-S6-C9E	AGCTTGTGGTCGTGGGAGCTGG	GCCTACGCCTACAGCTCCCACGACCAC	+6 G->T	11	16	10
krasG12V-P9R16-S6-C9E	AGCTTGTGGTCGTGGGAGCTGG	GCCTACGCCTACAGCTCCCACGACC	+6 G->T	9	16	10
krasG12V-P9R16-S1S6-C9E	AGCTTGTGGTCGTGGGAGCTGG	GCCTACGCCTACAGCACCCACGACC	+1 A->T;+6 G->T	9	16	10
krasG12V-P9R16-S2S6-C9E	AGCTTGTGGTCGTGGGAGCTGG	GCCTACGCCTACAGGTCCCACGACC	+2 G->C;+6 G->T	9	16	10
krasG12V-P9R16-S3S6-C9E	AGCTTGTGGTCGTGGGAGCTGG	GCCTACGCCTACACCTCCCACGACC	+2 C->G;+6 G->T	9	16	10
gRNA	Target sequence 5'->3'	Figure # and Supplementary (SI) Figure # of results
gpr78a	GAAACACTACGGCTATCCAGCGG	Fig. 1b, 1e, 1f
gprc5ba	GGGGATCATCGCTGCAGAATGG	Fig. 1b
scn2b	GGAAAGGTCGTTCTTATCCAGG	Fig. 1b
adgrf3b	GTGTATGGCAGATGTCCAGAGG	Fig. 1b, 1f, SI Fig. 1a
gpr85	GGAGGTCAGTTTAAGGAAAGTGG	Fig. 1b, 1f, SI Fig. 1c
cacng2b	GGTGGAATGCGGCAGTATGGGGG	Fig. 1b, 1f, SI Fig. 1b
egfp	GGTGAAGCACTGCACGCCGTAGG	Fig. 1e, 1f, SI Fig. 1a, 1b, 1c
Cas9-binding scaffold	Sequence (5'-> 3')
C9E	GTTTAAGAGCTATGCTGGAAACAGCATAGCAAGTTTAAATAAGGCTAGTCCGTTATCAACTTGAAAAAGTGGCACCGAGTCGGTGC
