# Supplementary material for: Enhancing CRISPR prime editing by reducing misfolded pegRNA interactions
Source: eLife. 2024 Jun 7;12:RP90948. doi: 10.7554/eLife.90948 (PMC11161173; doi:10.7554/eLife.90948)
Supplement: Supplementary file 3. [file elife-90948-supp3.xlsx]

## Sheet: Sheet1
Supplementary File 3. PCR formulation and primers used in the DNA template construction for gRNAs and pegRNAs. The target sequence for each pegRNA is shown in green. Sometimes an additional guanosine nucleotide was added at the 5' end of the target sequence to facilitate SP6-mediated transcription. The PBS and RT template sequence for each pegRNA is shown in red.
PCR reagent	Volume
BamHI-SP6 (100 μM)	0.6 μL
SP6-spacer forward primer (0.5 μM)	0.6 μL
C9E constant(0.5 μM)	0.6 μL
Reverse primer(100 μM) for pegRNA	0.6 μL
or C9-3' (100 μM) for gRNA
5x Phusion buffer	6 μL
Phusion Enzyme (2 U/μL)	0.3 μL
Water	21.3 μL
pegRNA in the C9E scaffold	SP6-spacer forward primer (5'-> 3')	Reverse primer (5'-> 3')
gpr78a-P10R14-S5-C9E	ATTTAGGTGACACTATAGAAACACTACGGCTATCCAGGTTTAAGAGCTATGCTGGAAACA	AAAATACGGCTATCCAGCTGTCTATGCCGCACCGACTCGGTGCCACTT
gpr78a-P13R14-S5-C9E	ATTTAGGTGACACTATAGAAACACTACGGCTATCCAGGTTTAAGAGCTATGCTGGAAACA	AAAACACTACGGCTATCCAGCTGTCTATGCCGCACCGACTCGGTGCCACTT
gpr78a-P10R14-S2S5-C9E	ATTTAGGTGACACTATAGAAACACTACGGCTATCCAGGTTTAAGAGCTATGCTGGAAACA	AAAATACGGCTATCCTGCTGTCTATGCCGCACCGACTCGGTGCCAC
gpr78a-P10R14-S5-C9E-3MUTSinPBS	ATTTAGGTGACACTATAGAAACACTACGGCTATCCAGGTTTAAGAGCTATGCTGGAAACA	AAAATACCGCAATGCAGCTGTCTATGCCGCACCGACTCGGTGCCACTT
gprc5ba-P10R14-S5-C9E	ATTTAGGTGACACTATAGGGGATCATCGCTGCAGAAGTTTAAGAGCTATGCTGGAAACA	AAAACATCGCTGCAGAATTGCTCCTGCTGCACCGACTCGGTGCCACTT
gprc5ba-P13R14-S5-C9E	ATTTAGGTGACACTATAGGGGATCATCGCTGCAGAAGTTTAAGAGCTATGCTGGAAACA	AAAAGATCATCGCTGCAGAATTGCTCCTGCTGCACCGACTCGGTGCCACTT
gprc5ba-P10R14-S1S5-C9E	ATTTAGGTGACACTATAGGGGATCATCGCTGCAGAAGTTTAAGAGCTATGCTGGAAACA	AAAACATCGCTGCACAATTGCTCCTGCTGCACCGACTCGGTGCCAC
gprc5ba-P10R14-S2S5-C9E	ATTTAGGTGACACTATAGGGGATCATCGCTGCAGAAGTTTAAGAGCTATGCTGGAAACA	AAAACATCGCTGCAGTATTGCTCCTGCTGCACCGACTCGGTGCCAC
gprc5ba-P10R14-S3S5-C9E	ATTTAGGTGACACTATAGGGGATCATCGCTGCAGAAGTTTAAGAGCTATGCTGGAAACA	AAAACATCGCTGCAGATTTGCTCCTGCTGCACCGACTCGGTGCCAC
scn2b-P10R14-S5-C9E	ATTTAGGTGACACTATAGGAAAGGTCGTTCTTATCCGTTTAAGAGCTATGCTGGAAACA	AAAAGTCGTTCTTATCCACGTTTCCAGTGCACCGACTCGGTGCCACTT
scn2b-P13R14-S5-C9E	ATTTAGGTGACACTATAGGAAAGGTCGTTCTTATCCGTTTAAGAGCTATGCTGGAAACA	AAAAAAGGTCGTTCTTATCCACGTTTCCAGTGCACCGACTCGGTGCCACTT
scn2b-P10R14-S2S5-Tend	ATTTAGGTGACACTATAGGAAAGGTCGTTCTTATCCGTTTAAGAGCTATGCTGGAAACA	AAAAGTCGTTCTTATGCACGTTTCCAGTGCACCGACTCGGTGCCAC
scn2b-P10R14-S5-Aend	ATTTAGGTGACACTATAGGAAAGGTCGTTCTTATCCGTTTAAGAGCTATGCTGGAAACA	TTTTGTCGTTCTTATCCACGTTTCCAGTGCACCGACTCGGTGCCAC
scn2b-P10R14-S1S5-Aend	ATTTAGGTGACACTATAGGAAAGGTCGTTCTTATCCGTTTAAGAGCTATGCTGGAAACA	TTTTGTCGTTCTTAACCACGTTTCCAGTGCACCGACTCGGTGCCAC
scn2b-P10R14-S2S5-Aend	ATTTAGGTGACACTATAGGAAAGGTCGTTCTTATCCGTTTAAGAGCTATGCTGGAAACA	TTTTGTCGTTCTTATGCACGTTTCCAGTGCACCGACTCGGTGCCAC
scn2b-P10R14-S3S5-Aend	ATTTAGGTGACACTATAGGAAAGGTCGTTCTTATCCGTTTAAGAGCTATGCTGGAAACA	TTTTGTCGTTCTTATCGACGTTTCCAGTGCACCGACTCGGTGCCAC
adgrf3b-P10R15-S5-C9E	ATTTAGGTGACACTATAGGTGTATGGCAGATGTCCAGGTTTAAGAGCTATGCTGGAAACA	AAAAGGCAGATGTCCAGACGCGACGAAGCGCACCGACTCGGTGCCACTT
adgrf3b-P13R15-S5-C9E	ATTTAGGTGACACTATAGGTGTATGGCAGATGTCCAGGTTTAAGAGCTATGCTGGAAACA	AAAATATGGCAGATGTCCAGACGCGACGAAGCGCACCGACTCGGTGCCACTT
adgrf3b-P10R15-S2S5-C9E	ATTTAGGTGACACTATAGGTGTATGGCAGATGTCCAGGTTTAAGAGCTATGCTGGAAACA	AAAAGGCAGATGTCCTGACGCGACGAAGCGCACCGACTCGGTGCCAC
adgrf3b-pegDEL5-C9E	ATTTAGGTGACACTATAGGTGTATGGCAGATGTCCAGGTTTAAGAGCTATGCTGGAAACA	AAAATATGGCAGATGTCGCGACGAAGCGCCATTGCACCGACTCGGTGCCACTT
adgrf3b-pegINS3-C9E	ATTTAGGTGACACTATAGGTGTATGGCAGATGTCCAGGTTTAAGAGCTATGCTGGAAACA	AAATATGGCAGATGTCTTTCAGAGGCGACGAAGCGCACCGACTCGGTGCCACTT
adgrf3b-P10R15-S5-C9E-3MUTSinPBS	ATTTAGGTGACACTATAGGTGTATGGCAGATGTCCAGGTTTAAGAGCTATGCTGGAAACA	AAAAGGCTGAAGTGCAGACGCGACGAAGCGCACCGACTCGGTGCCACTT
gpr85-P10R14-S5-C9E	ATTTAGGTGACACTATAGGAGGTCAGTTTAAGGAAAGGTTTAAGAGCTATGCTGGAAACA	AAAAAGTTTAAGGAAAGTCGCGAGCGGAGCACCGACTCGGTGCCACTT
gpr85-P13R14-S5-C9E	ATTTAGGTGACACTATAGGAGGTCAGTTTAAGGAAAGGTTTAAGAGCTATGCTGGAAACA	AAAAGTCAGTTTAAGGAAAGTCGCGAGCGGAGCACCGACTCGGTGCCACTT
gpr85-P10R14-S2S5-C9E	ATTTAGGTGACACTATAGGAGGTCAGTTTAAGGAAAGGTTTAAGAGCTATGCTGGAAACA	AAAAAGTTTAAGGAATGTCGCGAGCGGAGCACCGACTCGGTGCCAC
gpr85-pegDEL5-C9E	ATTTAGGTGACACTATAGGAGGTCAGTTTAAGGAAAGGTTTAAGAGCTATGCTGGAAACA	AAAAAGTTTAAGGAGCGAGCGGAGAGACGCACCGACTCGGTGCCACTT
gpr85-P10R14-S5-C9E-3MUTSinPBS	ATTTAGGTGACACTATAGGAGGTCAGTTTAAGGAAAGGTTTAAGAGCTATGCTGGAAACA	AAAAAGTATATGGTAAGTCGCGAGCGGAGCACCGACTCGGTGCCACTT
cacng2b-P10R15-S5-C9E	ATTTAGGTGACACTATAGGTGGAATGCGGCAGTATGGGTTTAAGAGCTATGCTGGAAACA	AAAATGCGGCAGTATGGGCGTGTTTGAGCGCACCGACTCGGTGCCACTT
cacng2b-P13R15-S5-C9E	ATTTAGGTGACACTATAGGTGGAATGCGGCAGTATGGGTTTAAGAGCTATGCTGGAAACA	AAAAGAATGCGGCAGTATGGGCGTGTTTGAGCGCACCGACTCGGTGCCACTT
cacng2b-P10R15-S2S5-C9E	ATTTAGGTGACACTATAGGTGGAATGCGGCAGTATGGGTTTAAGAGCTATGCTGGAAACA	AAAATGCGGCAGTATCGGCGTGTTTGAGCGCACCGACTCGGTGCCAC
cacng2b-pegDEL5-C9E	ATTTAGGTGACACTATAGGTGGAATGCGGCAGTATGGGTTTAAGAGCTATGCTGGAAACA	AAAAGAATGCGGCAGTAGTGTTTGAGCGCGCACCGACTCGGTGCCACTT
cacng2b-pegINS9-C9E	ATTTAGGTGACACTATAGGTGGAATGCGGCAGTATGGGTTTAAGAGCTATGCTGGAAACA	AAATGCGGCAGTATGCACCATCATGGGGTGTTTGAGCGCGCACCGACTCGGTGCCACTT
cacng2b-pegINS18-C9E	ATTTAGGTGACACTATAGGTGGAATGCGGCAGTATGGGTTTAAGAGCTATGCTGGAAACA	AAATGCGGCAGTATGCACCATCATCACCATCATGGGGTGTTTGAGCGCGCACCGACTCGGTGCCACTT
cacng2b-P10R15-S5-C9E-3MUTSinPBS	ATTTAGGTGACACTATAGGTGGAATGCGGCAGTATGGGTTTAAGAGCTATGCTGGAAACA	AAAATGCCGCTGTTTGGGCGTGTTTGAGCGCACCGACTCGGTGCCACTT
krasG12V-P11R16-S6-C9E	ATTTAGGTGACACTATAGAGCTTGTGGTCGTGGGAGCGTTTAAGAGCTATGCTGGAAACA	AAAAGTGGTCGTGGGAGCTGTAGGCGTAGGCGCACCGACTCGGTGCCACTT
krasG12V-P9R16-S6-C9E	ATTTAGGTGACACTATAGAGCTTGTGGTCGTGGGAGCGTTTAAGAGCTATGCTGGAAACA	AAAAGGTCGTGGGAGCTGTAGGCGTAGGCGCACCGACTCGGTGCCAC
krasG12V-P9R16-S1S6-C9E	ATTTAGGTGACACTATAGAGCTTGTGGTCGTGGGAGCGTTTAAGAGCTATGCTGGAAACA	AAAAGGTCGTGGGTGCTGTAGGCGTAGGCGCACCGACTCGGTGCCAC
krasG12V-P9R16-S2S6-C9E	ATTTAGGTGACACTATAGAGCTTGTGGTCGTGGGAGCGTTTAAGAGCTATGCTGGAAACA	AAAAGGTCGTGGGACCTGTAGGCGTAGGCGCACCGACTCGGTGCCAC
krasG12V-P9R16-S3S6-C9E	ATTTAGGTGACACTATAGAGCTTGTGGTCGTGGGAGCGTTTAAGAGCTATGCTGGAAACA	AAAAGGTCGTGGGAGGTGTAGGCGTAGGCGCACCGACTCGGTGCCAC
gpr78a	ATTTAGGTGACACTATAGAAACACTACGGCTATCCAGGTTTAAGAGCTATGCTGGAAACA	C9-3'
gprc5ba	ATTTAGGTGACACTATAGGGGATCATCGCTGCAGAAGTTTAAGAGCTATGCTGGAAACA	C9-3'
scn2b	ATTTAGGTGACACTATAGGAAAGGTCGTTCTTATCCGTTTAAGAGCTATGCTGGAAACA	C9-3'
adgrf3b	ATTTAGGTGACACTATAGGTGTATGGCAGATGTCCAGGTTTAAGAGCTATGCTGGAAACA	C9-3'
gpr85	ATTTAGGTGACACTATAGGAGGTCAGTTTAAGGAAAGGTTTAAGAGCTATGCTGGAAACA	C9-3'
cacng2b	ATTTAGGTGACACTATAGGTGGAATGCGGCAGTATGGGTTTAAGAGCTATGCTGGAAACA	C9-3'
egfp	ATTTAGGTGACACTATAGGTGAAGCACTGCACGCCGTGTTTAAGAGCTATGCTGGAAACA	C9-3'
Oligo name	Sequence (5'-> 3')
C9E constant	AAAAAAAGCACCGACTCGGTGCCACTTTTTCAAGTTGATAACGGACTAGCCTTATTTAAACTTGCTATGCTGTTTCCAGCATAGCTCTTAAAC
BamHI-SP6	GGATCCATTTAGGTGACACTATA
C9-3'	AAAAGCACCGACTCGGTGCCACTT
