# Supplementary material for: Enhancing CRISPR prime editing by reducing misfolded pegRNA interactions
Source: eLife. 2024 Jun 7;12:RP90948. doi: 10.7554/eLife.90948 (PMC11161173; doi:10.7554/eLife.90948)
Supplement: Supplementary file 5. [file elife-90948-supp5.xlsx]

## Sheet: Sheet1
Supplementary File 5. PCR primers for deep sequencing.
Primer name	Primer sequence (5'-3')	Application
OHL28	ACACTCTTTCCCTACACGACGCTCTTCCGATCTGAGTTCCCTGCACGCTCGTC	Amplifying the cacng2b site; 1st PCR for deep sequencing
OHL29	GACTGGAGTTCAGACGTGTGCTCTTCCGATCTAGTACAGCCAGTAGTCGGTGCC
OHL34	ACACTCTTTCCCTACACGACGCTCTTCCGATCTTGGCGATCACTTTTGTTACACCG	Amplifying the gpr78a site; 1st PCR for deep sequencing
OHL35	GACTGGAGTTCAGACGTGTGCTCTTCCGATCTGAGAACGCGAGAGAGTGGAGCC
OHL36	ACACTCTTTCCCTACACGACGCTCTTCCGATCTCTGCTTCAAAGCACACCAGA	Amplifying the gpr85 site; 1st PCR for deep sequencing
OHL37	GACTGGAGTTCAGACGTGTGCTCTTCCGATCTCGCTCGATGAAGGCTCTTGTC
OHL42	ACACTCTTTCCCTACACGACGCTCTTCCGATCTGAGCATCTGCATCATCCGCCGC	Amplifying the gprc5ba site; 1st PCR for deep sequencing
OHL43	GACTGGAGTTCAGACGTGTGCTCTTCCGATCTCACACAGGCTAGCGTAAAGTCCAG
OHL44	ACACTCTTTCCCTACACGACGCTCTTCCGATCTGAACACCTATAAGATGATACCCTT	Amplifying the scn2b site; 1st PCR for deep sequencing
OHL45	GACTGGAGTTCAGACGTGTGCTCTTCCGATCTATTCAGTCAGGACGGCAAACTGG
OHL46	ACACTCTTTCCCTACACGACGCTCTTCCGATCTGTATACATTGAGGCACCTGCAG	Amplifying the adgrf3b site; 1st PCR for deep sequencing
OHL47	GACTGGAGTTCAGACGTGTGCTCTTCCGATCTCCAGTATCCATTTGTCTTTAAAAGCG
OHL50	ACACTCTTTCCCTACACGACGCTCTTCCGATCTCTCAACTTGCTCTTGTTTAGTAGCG	Amplifying the krasG12V site; 1st PCR for deep sequencing
OHL51	GACTGGAGTTCAGACGTGTGCTCTTCCGATCTAGCACCAGACACTGTAGCAGC
Index Primers	NEBNext® Multiplex Oligos for Illumina (NEB E7600S)	2nd PCR for deep sequencing (barcodeing)
PR224	TGTAAAACGACGGCCAGTGTATACATTGAGGCACCTGCAG	Amplifying the adgrf3b site; 1st PCR；Forward primer with barcode 1
PR225	CCAGTATCCATTTGTCTTTAAAAGCG	Amplifying the adgrf3b site; 1st PCR；Reverse primer with barcode 1
PR511	CTCACTATAGCAGTATACATTGAGGCACCTGCAG	Amplifying the adgrf3b site; 1st PCR；Forward primer with barcode 2
PR512	CTCTTCCGATCTGTATACATTGAGGCACCTGCAG	Amplifying the adgrf3b site; 1st PCR；Forward primer with barcode 3
PR479	ACGACGGCCAGTCTCAACTTGCTCTTGTTTAGTAGCG	Amplifying the kras site; 1st PCR；Forward primer with barcode 1
PR482	CTCACTATAGCACTCAACTTGCTCTTGTTTAGTAGCG	Amplifying the kras site; 1st PCR；Forward primer with barcode 2
PR483	AGCACCAGACACTGTAGCAGC	Amplifying the kras site; 1st PCR；Reverse primer with barcode 1
PR513	CTCTTCCGATCTCTCAACTTGCTCTTGTTTAGTAGCG	Amplifying the kras site; 1st PCR；Forward primer with barcode 3
PR536	CAGATGCTAGAGCACCAGACACTGTAGCAGC	Amplifying the kras site; 1st PCR；Reverse primer with barcode 2
PR537	ATATCCGTTGAGCACCAGACACTGTAGCAGC	Amplifying the kras site; 1st PCR；Reverse primer with barcode 3
PR222	TGTAAAACGACGGCCAGTGAGTTCCCTGCACGCTCGTC	Amplifying the cacng2b site; 1st PCR；Forward primer with barcode 1
PR223	AGTACAGCCAGTAGTCGGTGCC	Amplifying the cacng2b site; 1st PCR；Reverse primer with barcode 1
PR514	CTCACTATAGCAGAGTTCCCTGCACGCTCGTC	Amplifying the cacng2b site; 1st PCR；Forward primer with barcode 2
PR515	CTCTTCCGATCTGAGTTCCCTGCACGCTCGTC	Amplifying the cacng2b site; 1st PCR；Forward primer with barcode 3
PR420	TGGCGATCACTTTTGTTACACCG	Amplifying the gpr78a site; 1st PCR；Reverse primer with barcode 1
PR516	CTCACTATAGCAGAGAACGCGAGAGAGTGGAGCC	Amplifying the gpr78a site; 1st PCR；Forward primer with barcode 1
PR517	CTCTTCCGATCTGAGAACGCGAGAGAGTGGAGCC	Amplifying the gpr78a site; 1st PCR；Forward primer with barcode 2
PR518	ACGACGGCCAGTGAGAACGCGAGAGAGTGGAGCC	Amplifying the gpr78a site; 1st PCR；Forward primer with barcode 3
PR421	GCGCAGAGTCTCCGGCTG	Amplifying the gpcr5ba site; 1st PCR；Reverse primer with barcode 1
PR422	TGTAAAACGACGGCCAGTCACACAGGCTAGCGTAAAGTCCAG	Amplifying the gpcr5ba site; 1st PCR；Forward primer with barcode 1
PR480	CTCACTATAGCACACAGGCTAGCGTAAAGTCCAG	Amplifying the gpcr5ba site; 1st PCR；Forward primer with barcode 2
PR519	CTCTTCCGATCTCACACAGGCTAGCGTAAAGTCCAG	Amplifying the gpcr5ba site; 1st PCR；Forward primer with barcode 3
PR538	CAGATGCTAGGCGCAGAGTCTCCGGCTG	Amplifying the gpcr5ba site; 1st PCR；Reverse primer with barcode 2
PR539	ATATCCGTTGGCGCAGAGTCTCCGGCTG	Amplifying the gpcr5ba site; 1st PCR；Reverse primer with barcode 3
PR418	GATGATACCCTTGAAGCCCAGTC	Amplifying the scn2b site; 1st PCR；Reverse primer with barcode 1
PR419	TGTAAAACGACGGCCAGTATTCAGTCAGGACGGCAAACTGG	Amplifying the scn2b site; 1st PCR；Forward primer with barcode 1
PR481	CTCACTATAGCAATTCAGTCAGGACGGCAAACTGG	Amplifying the scn2b site; 1st PCR；Forward primer with barcode 2
PR520	CTCTTCCGATCTATTCAGTCAGGACGGCAAACTGG	Amplifying the scn2b site; 1st PCR；Forward primer with barcode 3
PR540	CAGATGCTAGGATGATACCCTTGAAGCCCAGTC	Amplifying the scn2b site; 1st PCR；Reverse primer with barcode 2
PR541	ATATCCGTTGGATGATACCCTTGAAGCCCAGTC	Amplifying the scn2b site; 1st PCR；Reverse primer with barcode 3
PR521	CTCACTATAGCACTGCTTCAAAGCACACCAGA	Amplifying the gpr85 site; 1st PCR；Forward primer with barcode 1
PR522	ACGACGGCCAGTCTGCTTCAAAGCACACCAGA	Amplifying the gpr85 site; 1st PCR；Forward primer with barcode 2
PR523	CTCTTCCGATCTCTGCTTCAAAGCACACCAGA	Amplifying the gpr85 site; 1st PCR；Forward primer with barcode 3
PR524	CGCTCGATGAAGGCTCTTGTC	Amplifying the gpr85 site; 1st PCR；Reverse primer with barcode 1
